# Supplementary material for: One‐Pot Chemoenzymatic Synthesis of Microviridin Analogs Containing Functional Tags
Source: PubMed Central journal article supplement (PMC9826346; doi:10.1002/cbic.202200345), 2022-09-13
Supplement: CBIC-23-0-s001.pdf [file CBIC-23-0-s001.pdf]

# ChemBioChem

Supporting Information

## **One-Pot Chemoenzymatic Synthesis of Microviridin Analogues Containing Functional Tags**

Stella Scholz, Sofia Kerestetzopoulou, Vincent Wiebach, Romina Schnegotzki,  
Bianca Schmid, Emmanuel Reyna-González, Ling Ding, Roderich D. Süssmuth,  
Elke Dittmann, and Martin Baunach\*

## 1. Material and Methods (Additional Notes)

## 2. Supplementary Tables

**Table S1.** Mass spectrometric analysis of the cyclization assays.

**Table S2.** Overall theoretical yields, isolated yields and percent yields for the enzymatic conversions.

## 3. Supplementary Figures

**Figure S1.** Chemoenzymatic synthesis of C-terminally modified Mv J and Mv B derivatives.

**Figure S2.** Results of the the repeated enzymatic conversion of MvJ\_CP\_N(Prop).

**Figure S3.** MALDI-TOF MS spectrum of unmodified MvJ\_CP.

**Figure S4.** MALDI-TOF MS spectrum of bicyclic MvJ\_CP.

**Figure S5.** MALDI-TOF MS spectrum of tricyclic MvJ\_CP.

**Figure S6.** MALDI-TOF MS spectrum of unmodified MvJ\_CP\_N(Bio).

**Figure S7.** MALDI-TOF MS spectrum of bicyclic MvJ\_CP\_N(Bio).

**Figure S8.** MALDI-TOF MS spectrum of tricyclic MvJ\_CP\_N(Bio).

**Figure S9.** MALDI-TOF MS spectrum of unmodified MvJ\_CP\_C(Bio).

**Figure S10.** MALDI-TOF MS spectrum of monocyclic MvJ\_CP\_C(Bio).

**Figure S11.** MALDI-TOF MS spectrum of unmodified MvJ\_CP\_N(Prop).

**Figure S12.** MALDI-TOF MS spectrum of monocyclic MvJ\_CP\_N(Prop).

**Figure S13.** MALDI-TOF MS spectrum of bicyclic MvJ\_CP\_N(Prop).

**Figure S14.** MALDI-TOF MS spectrum of tricyclic MvJ\_CP\_N(Prop).

**Figure S15.** MALDI-TOF MS spectrum of unmodified MvJ\_CP\_C(Prop).

**Figure S16.** MALDI-TOF MS spectrum of monocyclic MvJ\_CP\_C(Prop).

**Figure S17.** MALDI-TOF MS spectrum of unmodified MvB\_CP.

**Figure S18.** MALDI-TOF MS spectrum of monocyclic MvB\_CP.

**Figure S19.** MALDI-TOF MS spectrum of bicyclic MvB\_CP.

**Figure S20.** MALDI-TOF MS spectrum of tricyclic MvB\_CP.

**Figure S21.** MALDI-TOF MS spectrum of unmodified MvB\_CP\_N(Bio).

**Figure S22.** MALDI-TOF MS spectrum of monocyclic MvB\_CP\_N(Bio).

**Figure S23.** MALDI-TOF MS spectrum of bicyclic MvB\_CP\_N(Bio).

**Figure S24.** MALDI-TOF MS spectrum of tricyclic MvB\_CP\_N(Bio).

**Figure S25.** MALDI-TOF MS spectrum of unmodified MvB\_CP\_C(Bio).

**Figure S26.** MALDI-TOF MS spectrum of monocyclic MvB\_CP\_C(Bio).

**Figure S27.** MALDI-TOF MS spectrum of unmodified MvB\_CP\_N(dansyl).

**Figure S28.** MALDI-TOF MS spectrum of monocyclic MvB\_CP\_N(dansyl).

**Figure S29.** MALDI-TOF MS spectrum of bicyclic MvB\_CP\_N(dansyl).

**Figure S30.** MALDI-TOF MS spectrum of tricyclic MvB\_CP\_N(dansyl).

**Figure S31.** MALDI-TOF MS/MS spectrum of tricyclic MvJ\_CP (1).

**Figure S32.** MALDI-TOF MS/MS spectrum of tricyclic MvJ\_CP\_N(Bio) (2).

**Figure S33.** MALDI-TOF MS/MS spectrum of tricyclic MvJ\_CP\_N(Prop) (3).

**Figure S34.** MALDI-TOF MS/MS spectrum of tricyclic MvB\_CP (4).

**Figure S35.** MALDI-TOF MS/MS spectrum of tricyclic MvB\_CP\_N(Bio) (5).

**Figure S36.** MALDI-TOF MS/MS spectrum of tricyclic MvB\_CP\_N(dansyl) (6).

**Figure S37.** Ring-opening reactions during MS/MS analysis.

**Figure S38.** Results of the protease inhibition assay of the microviridin J derivatives.

**Figure S39.** Results of the protease inhibition assay of the microviridin B derivatives.

**Figure S40.** Blank control for protease labeling assay.

# 1. Material and Methods (Additional Notes)

## Synthesis protocol for automated solid-phase peptide synthesis

### Loading:

To a 20 ml syringe reactor with frit and cap 2-chloro-tritylchloride (TCP) resin (2 g, 1.4 mmol/g) and dry DCM (14 mL) were added. The resin was pre-swollen for 10 min and the solvent was removed by evaporation in vacuum. A mixture of the amino acid (8.40 mmol, 3 eq.) and DIPEA (5 eq.) dissolved in dry DCM (10 mL) was added to the resin. The syringe was agitated for 30 min at room temperature. The solution was removed and the resin was washed (2x 10 mL DMF, 1x 10 mL DCM). Capping of non-reacted functional groups of the resin was performed with DCM, methanol and DIPEA 80:15:5 (2x 15 mL, 10 min). After washing (5x 10 mL DMF), Fmoc-removal was achieved with DMF/piperidine (4:1, 10 mL, 1x 2 min, 1x 20 min). After final washing (2x 10 mL DMF, 1x 10 mL methanol, 3x 10 mL DCM), the resin was dried *in vacuo*.

### Coupling of Fmoc/*t*Bu-protected amino acids:

To 200 mg of the resin (~ 0.5 mmol/g), a 0.25 M solution of the amino acid in DMF (2.5 eq. relative to resin loading) was added. After addition of a 0.5 M solution of DIPEA in DMF (2.5 eq.) and a 0.25 M solution of TBTU in DMF (2.5 eq.), the reaction solution was mixed for 15 min. A second coupling was performed for 15 min. For couplings subsequent to the 5th amino acid, double couplings with 30 min coupling time were performed. For couplings subsequent to the 10th amino acid, a third coupling with 45 min was performed. After each coupling cycle capping with 0.5 M acetic anhydride in DMF (2 x 2.5 mL, 10 min) was performed. Finally, the resin was washed with DMF (6 x 2.5 mL).

### Fmoc removal:

DMF/piperidine (4:1, 2.5 mL) was added to the resin and mixed for 2.5 min. The procedure was repeated 4 times. The resin was washed with DMF (6x 2.5 mL). After the final coupling cycle, the resin was washed with DCM (3 x 2 mL).

### Dansyl derivatization:

The reagent 1-dimethylaminonaphthalene-5-sulfonyl chloride (dansyl chloride, DNS-Cl, 3eq.) and DIPEA (3 eq.) in DMF (10 mL) were added to the resin-bound peptide after Fmoc-removal to derivatize the N-terminal free amino group. The suspension was mixed for 20 min. The resin was washed with DMF (3x 2.5 mL).

### Global deprotection:

The resin was transferred to a 5 mL syringe with frit and cap. After addition of the cleavage cocktail (TFA, H<sub>2</sub>O, TES, DODT (3,6-dioxa-1,8-octane-dithiole) 92.5:2.5:2.5:2.5), the syringe was shaken for 3 h. The peptide was precipitated in ice cold diethyl ether and centrifuged. The supernatant was removed and the precipitate was washed with diethyl ether twice. The peptide was resolved in MeCN/H<sub>2</sub>O (1:4) and lyophilized.

## 2. Supplementary Tables

**Table S1.** Mass spectrometric analysis of the cyclization assays. The masses of the modified core peptides correspond to the monocyclic, bicyclic and tricyclic microviridin products due to mass shifts suggestive of the loss of one, two, or three water molecules ( $-H_2O$ : mass shift of 18.01 Da) as a consequence of lactone and lactame ring forming during condensation reactions.

|                         |            | Calculated (Da) | Measured (m/z) | Error [ppm] |
|-------------------------|------------|-----------------|----------------|-------------|
| <b>MvJ_CP</b>           | Unmodified | 1696.7966       | 1696.8045      | 4.7         |
|                         | Bicyclic   | 1660.7755       | 1660.7842      | 5.3         |
|                         | Tricyclic  | 1642.7649       | 1642.7729      | 4.9         |
| <b>MvJ_CP_N(Bio)</b>    | Unmodified | 2050.9692       | 2050.9781      | 4.4         |
|                         | Bicyclic   | 2014.9480       | 2014.9561      | 4.0         |
|                         | Tricyclic  | 1996.9375       | 1996.9462      | 4.4         |
| <b>MvJ_CP_C(Bio)</b>    | Unmodified | 2050.9692       | 2050.9778      | 4.2         |
|                         | Monocyclic | 2032.9586       | 2032.9656      | 3.4         |
| <b>MvJ_CP_N(Prop)</b>   | Unmodified | 1897.8756       | 1897.8817      | 3.2         |
|                         | Monocyclic | 1879.8671       | 1879.8702      | 2.8         |
|                         | Bicyclic   | 1861.8545       | 1861.8629      | 4.5         |
|                         | Tricyclic  | 1843.8439       | 1843.8489      | 2.7         |
| <b>MvJ_CP_C(Prop)</b>   | Unmodified | 1897.8756       | 1897.8827      | 4.2         |
|                         | Monocyclic | 1879.8650       | 1897.8827      | 3.4         |
| <b>MvB_CP</b>           | Unmodified | 1735.7850       | 1735.7894      | 2.5         |
|                         | Monocyclic | 1717.7745       | 1717.7776      | 1.8         |
|                         | Bicyclic   | 1699.7639       | 1699.7692      | 3.1         |
|                         | Tricyclic  | 1681.7534       | 1681.7576      | 2.5         |
| <b>MvB_CP_N(Bio)</b>    | Unmodified | 2089.9576       | 2089.9606      | 1.4         |
|                         | Monocyclic | 2071.9470       | 2071.9515      | 2.2         |
|                         | Bicyclic   | 2053.9365       | 2053.9425      | 2.9         |
|                         | Tricyclic  | 2035.9259       | 2035.9342      | 4.1         |
| <b>MvB_CP_C(bio)</b>    | Unmodified | 2089.9576       | 2089.9661      | 4.1         |
|                         | Monocyclic | 2071.9470       | 2071.9563      | 4.5         |
| <b>MvB_CP_N(dansyl)</b> | Unmodified | 1968.8361       | 1968.8436      | 3.8         |
|                         | Monocyclic | 1950.8255       | 1950.8321      | 3.4         |
|                         | Bicyclic   | 1932.8150       | 1932.8233      | 4.3         |
|                         | Tricyclic  | 1914.8044       | 1914.8120      | 4.0         |

**Table S2.** Overall theoretical yields, isolated yields and percent yields for the enzymatic conversions.

|                                     | <b>Theoretical yield</b> | <b>Isolated yield</b> | <b>Percent yield</b> |
|-------------------------------------|--------------------------|-----------------------|----------------------|
| MvJ_CP <sub>cy3</sub> (1)           | 1549 µg                  | 302 µg                | 19%                  |
| MvJ_CP_N(Bio) <sub>cy3</sub> (2)    | 1558 µg                  | 213 µg                | 14%                  |
| MvJ_CP_N(Prop) <sub>cy3</sub> (3)   | 2798 µg                  | 158 µg                | 6%                   |
| MvB_CP <sub>cy3</sub> (4)           | 1440 µg                  | 272 µg                | 19%                  |
| MvB_CP_N(Bio) <sub>cy3</sub> (5)    | 1559 µg                  | 243 µg                | 16%                  |
| MvB_CP_N(dansyl) <sub>cy3</sub> (6) | 1556 µg                  | 398 µg                | 26%                  |

### 3. Supplementary Figures

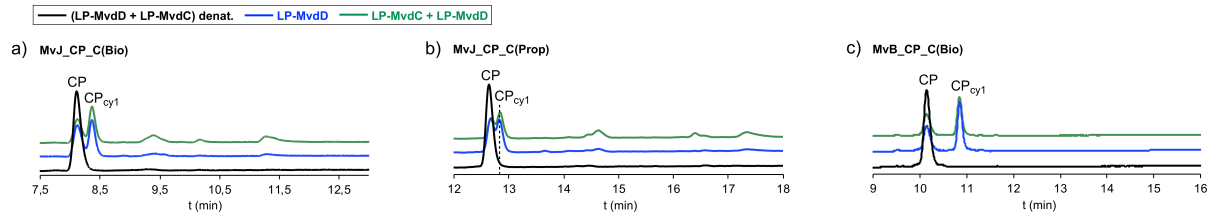

**Figure S1.** Chemoenzymatic synthesis of C-terminally modified microviridin J and microviridin B derivatives by using LP-MvdD alone (blue line) or in combination with LP-MvdC (green line). a)-c) HPLC monitoring (absorbance at 199 nm) of enzyme assays. Novel peaks correspond to monocyclic ( $CP_{cy1}$ ) microviridin products as indicated by mass spectrometric analysis (Figure S3-S30, Table S1).

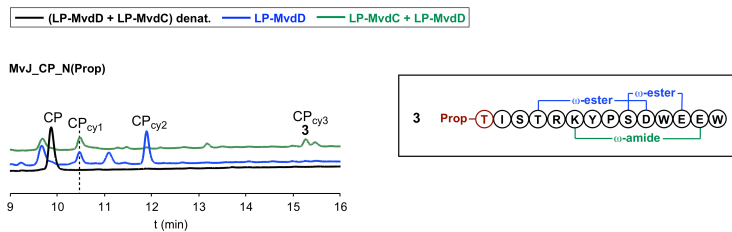

**Figure S2.** Results of the repeated enzymatic conversion of MvJ\_CP\_N(Prop). HPLC monitoring (absorbance at 199 nm) of enzyme assay.

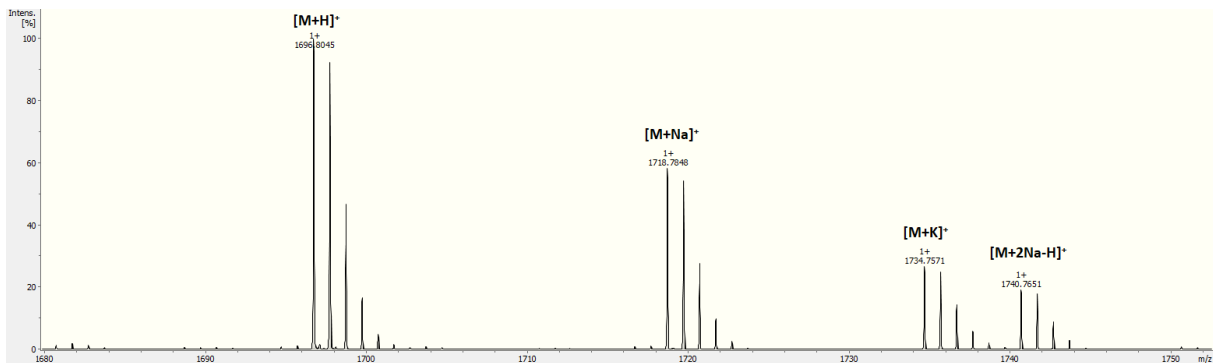

**Figure S3.** MALDI-TOF MS spectrum of unmodified MvJ\_CP with relevant adduct ions labelled. Overview of measured and calculated masses can be found in Table S1.

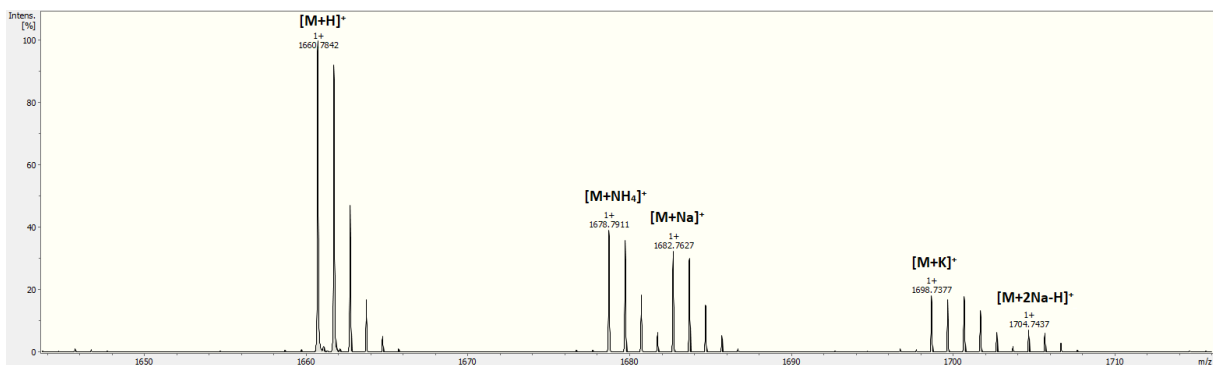

**Figure S4.** MALDI-TOF MS spectrum of bicyclic MvJ\_CP with relevant adduct ions labelled. Overview of measured and calculated masses can be found in Table S1.

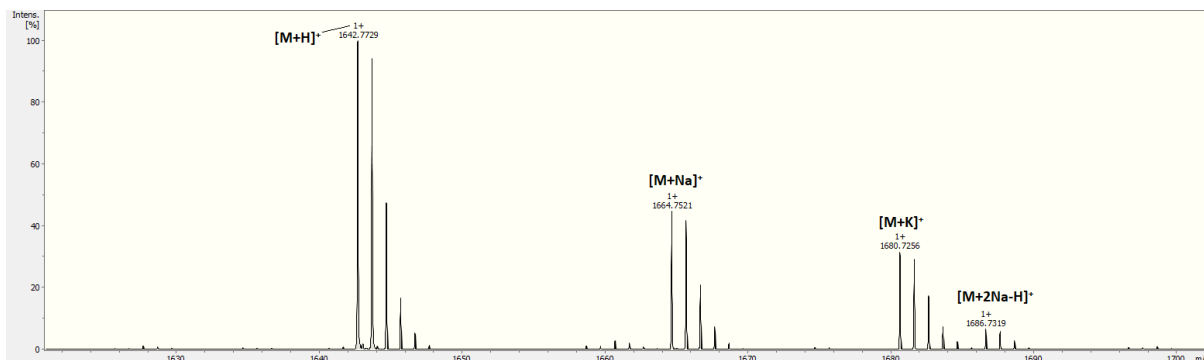

**Figure S5.** MALDI-TOF MS spectrum of tricyclic MvJ\_CP with relevant adduct ions labelled. Overview of measured and calculated masses can be found in Table S1.

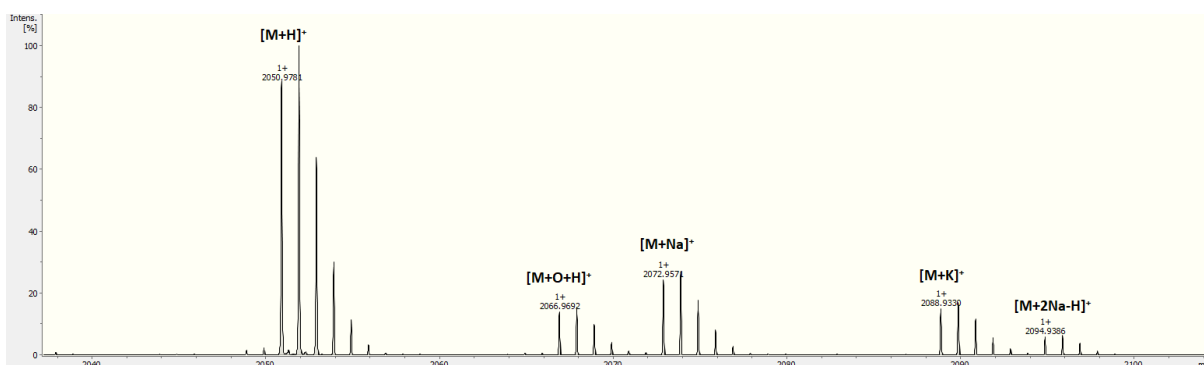

**Figure S6.** MALDI-TOF MS spectrum of unmodified MvJ\_CP\_N(Bio) with relevant adduct ions labelled. Overview of measured and calculated masses can be found in Table S1.

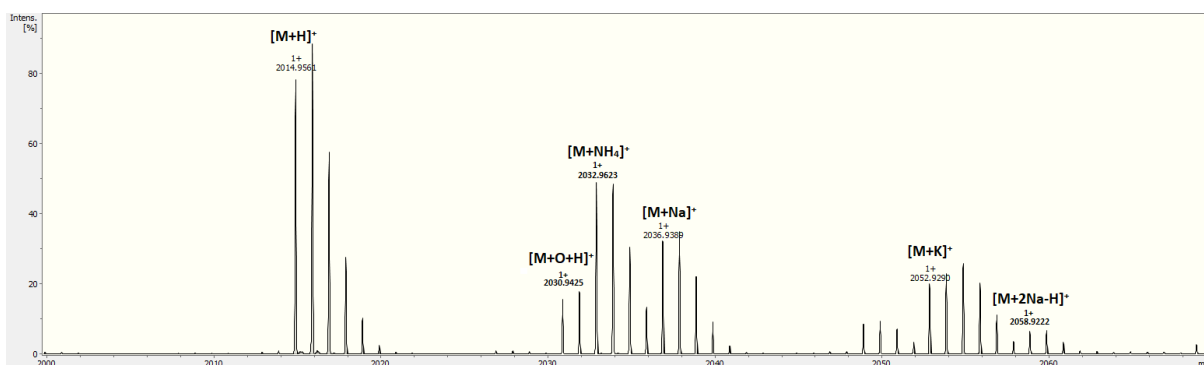

**Figure S7.** MALDI-TOF MS spectrum of bicyclic MvJ\_CP\_N(Bio) with relevant adduct ions labelled. Overview of measured and calculated masses can be found in Table S1.

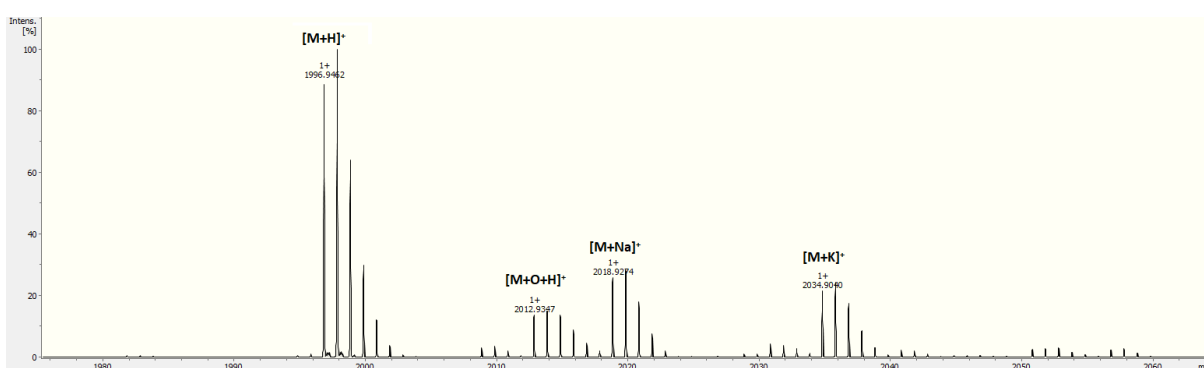

**Figure S8.** MALDI-TOF MS spectrum of tricyclic MvJ\_CP\_N(Bio) with relevant adduct ions labelled. Overview of measured and calculated masses can be found in Table S1.

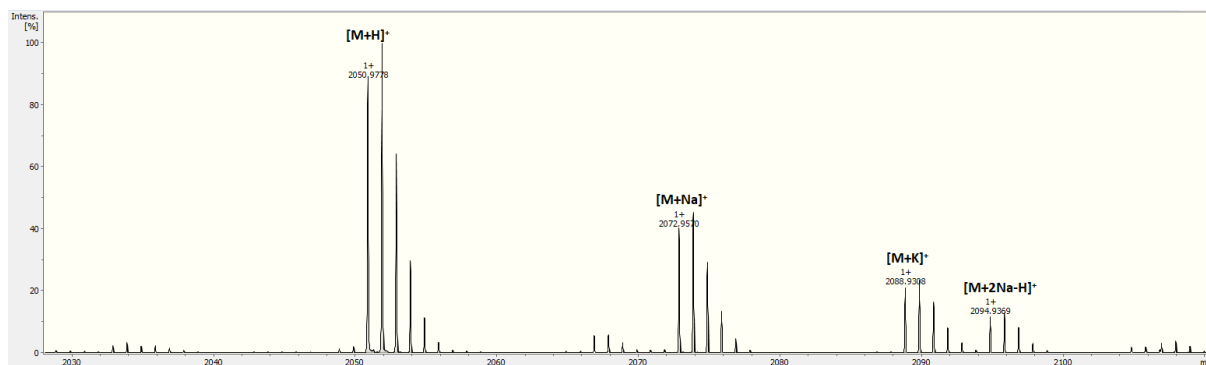

**Figure S9.** MALDI-TOF MS spectrum of unmodified MvJ\_CP\_C(Bio) with relevant adduct ions labelled. Overview of measured and calculated masses can be found in Table S1.

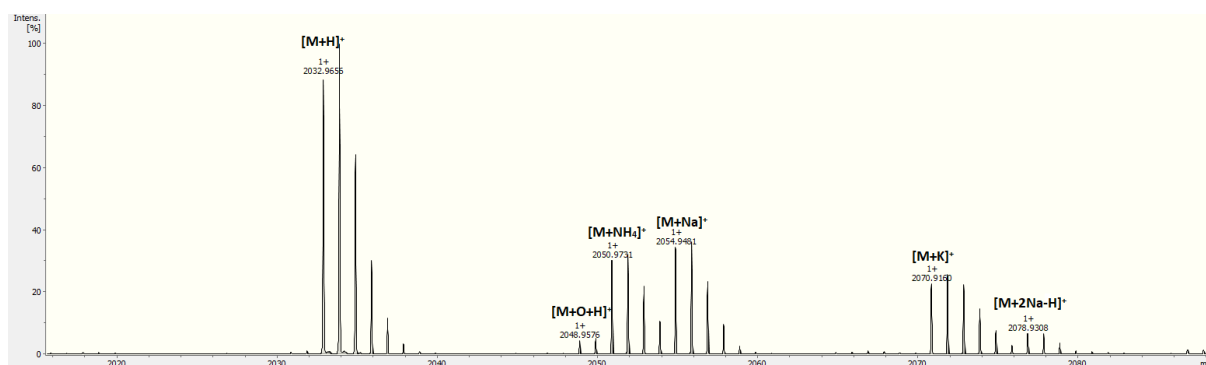

**Figure S10.** MALDI-TOF MS spectrum of monocyclic MvJ\_CP\_C(Bio) with relevant adduct ions labelled. Overview of measured and calculated masses can be found in Table S1.

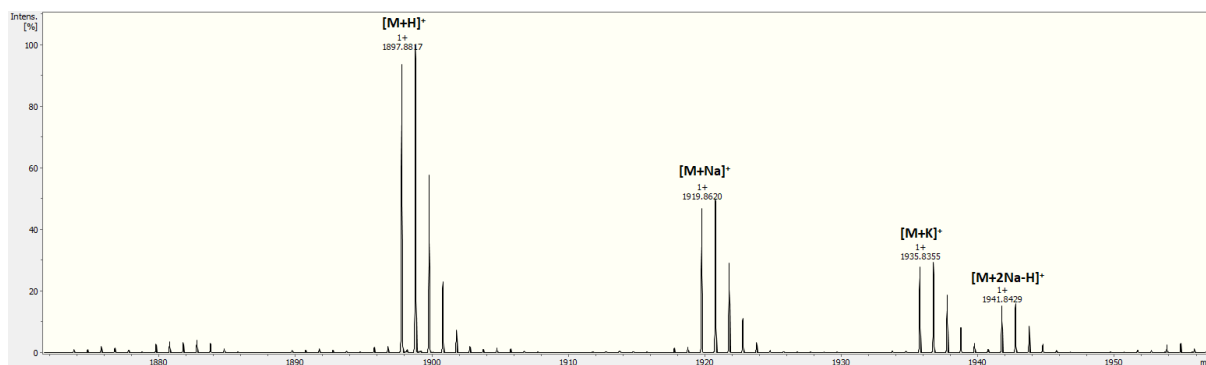

**Figure S11.** MALDI-TOF MS spectrum of unmodified MvJ\_CP\_N(Prop) with relevant adduct ions labelled. Overview of measured and calculated masses can be found in Table S1.

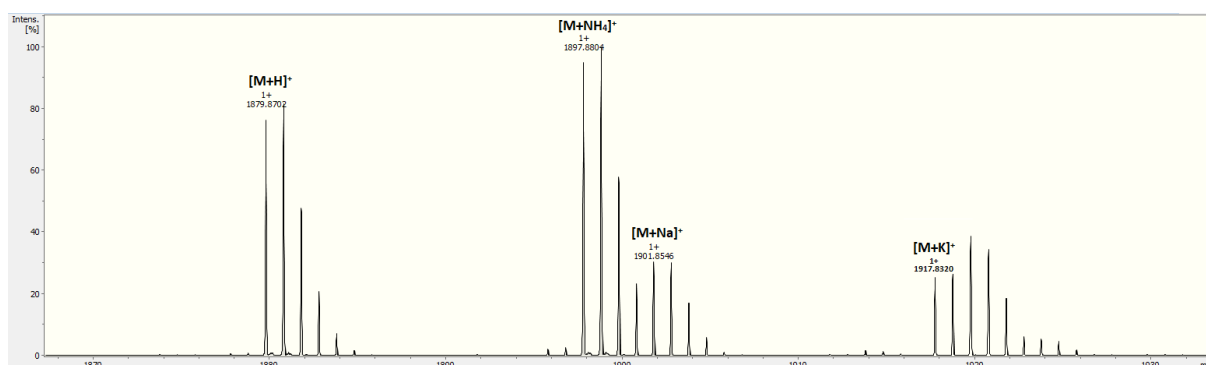

**Figure S12.** MALDI-TOF MS spectrum of monocyclic MvJ\_CP\_N(Prop) with relevant adduct ions labelled. Overview of measured and calculated masses can be found in Table S1.



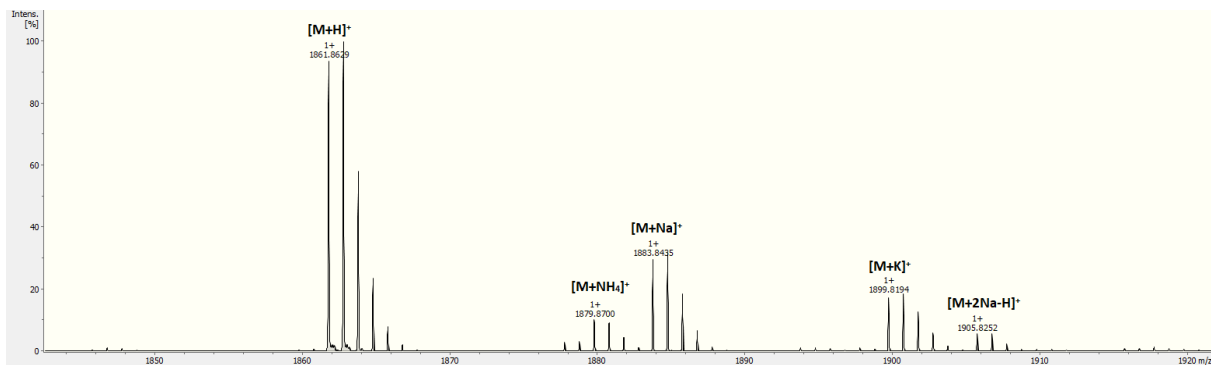

**Figure S13.** MALDI-TOF MS spectrum of bicyclic MvJ\_CP\_N(Prop) with relevant adduct ions labelled. Overview of measured and calculated masses can be found in Table S1.

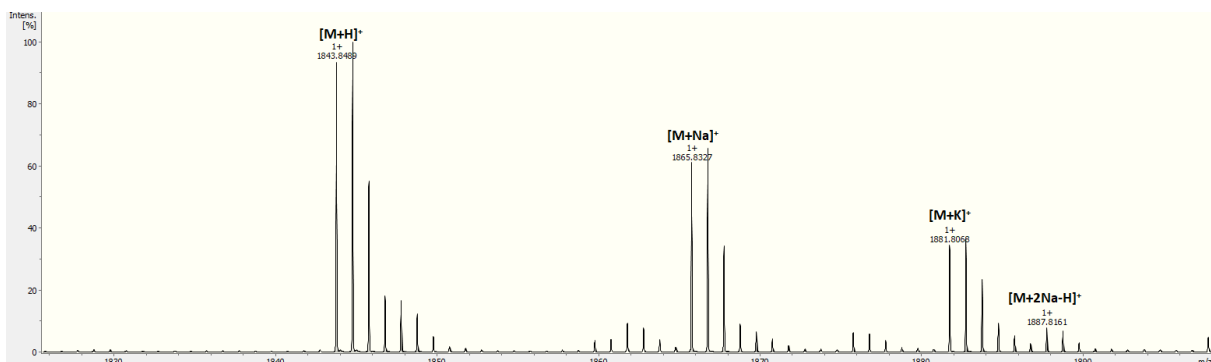

**Figure S14.** MALDI-TOF MS spectrum of tricyclic MvJ\_CP\_N(Prop) with relevant adduct ions labelled. Overview of measured and calculated masses can be found in Table S1.

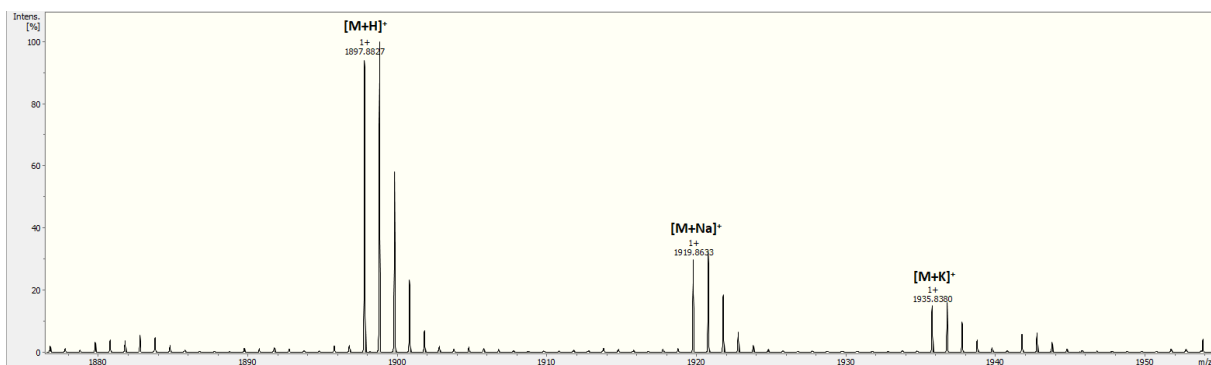

**Figure S15.** MALDI-TOF MS spectrum of unmodified MvJ\_CP\_C(Prop) with relevant adduct ions labelled. Overview of measured and calculated masses can be found in Table S1.

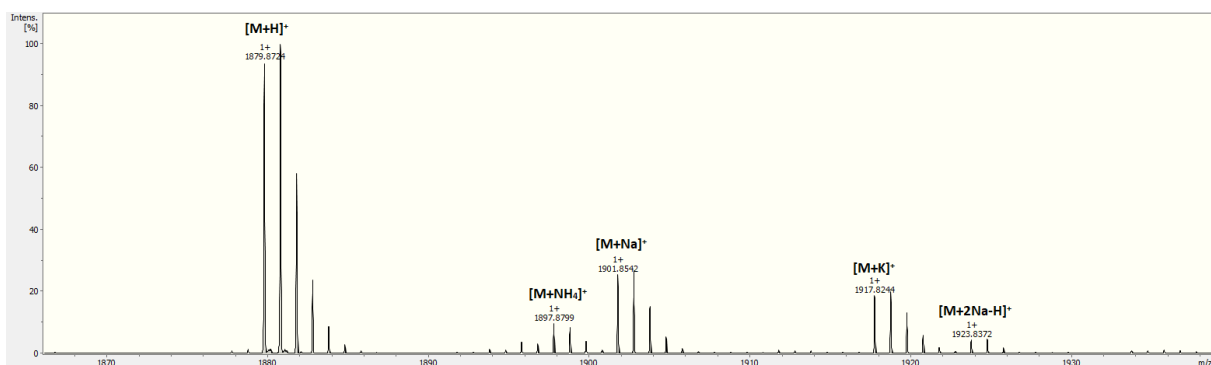

**Figure S16.** MALDI-TOF MS spectrum of monocyclic MvJ\_CP\_C(Prop) with relevant adduct ions labelled. Overview of measured and calculated masses can be found in Table S1.

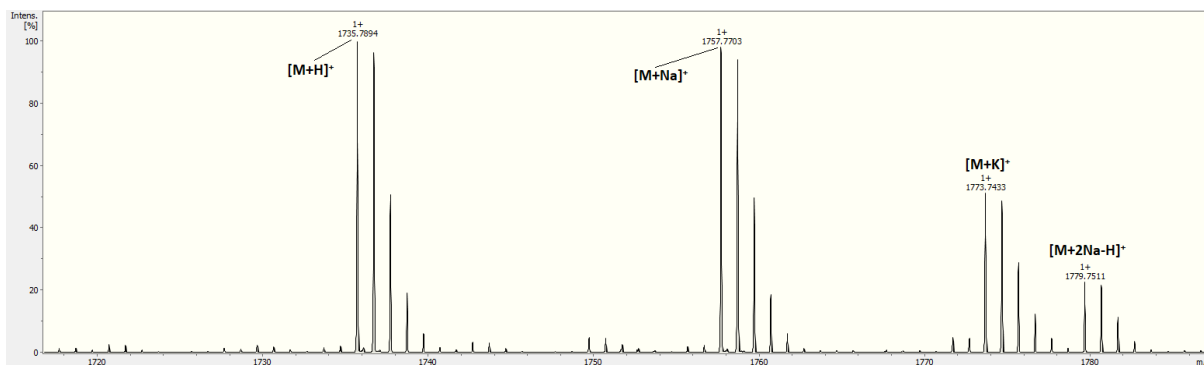

**Figure S17.** MALDI-TOF MS spectrum of unmodified MvB\_CP with relevant adduct ions labelled. Overview of measured and calculated masses can be found in Table S1.

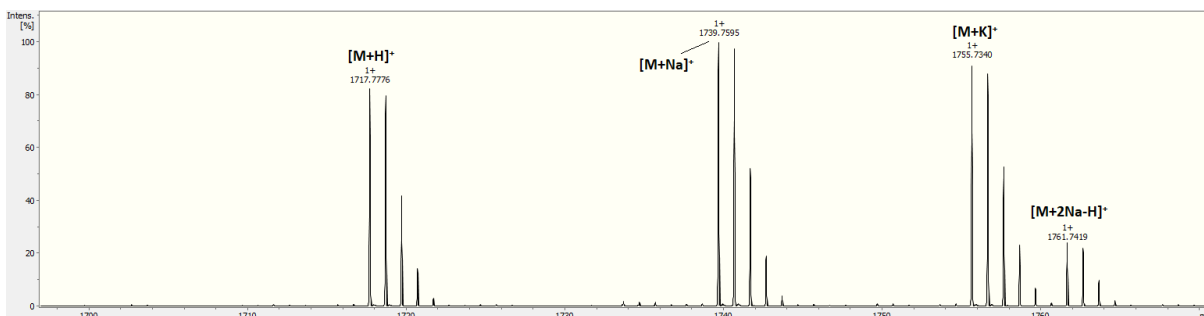

**Figure S18.** MALDI-TOF MS spectrum of monocyclic MvB\_CP with relevant adduct ions labelled. Overview of measured and calculated masses can be found in Table S1.

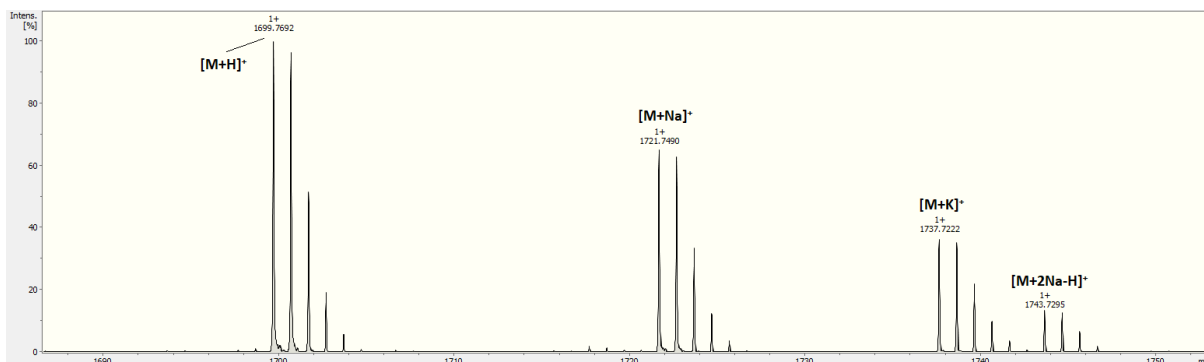

**Figure S19.** MALDI-TOF MS spectrum of bicyclic MvB\_CP with relevant adduct ions labelled. Overview of measured and calculated masses can be found in Table S1.

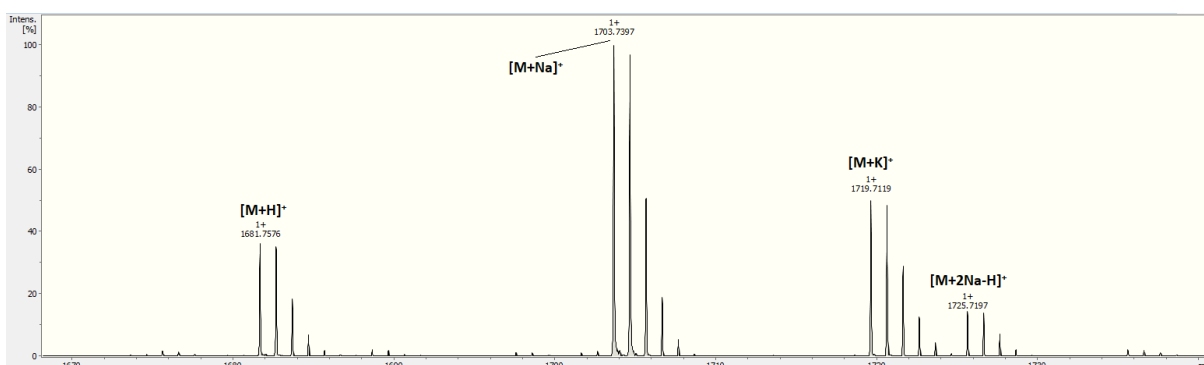

**Figure S20.** MALDI-TOF MS spectrum of tricyclic MvB\_CP with relevant adduct ions labelled. Overview of measured and calculated masses can be found in Table S1.

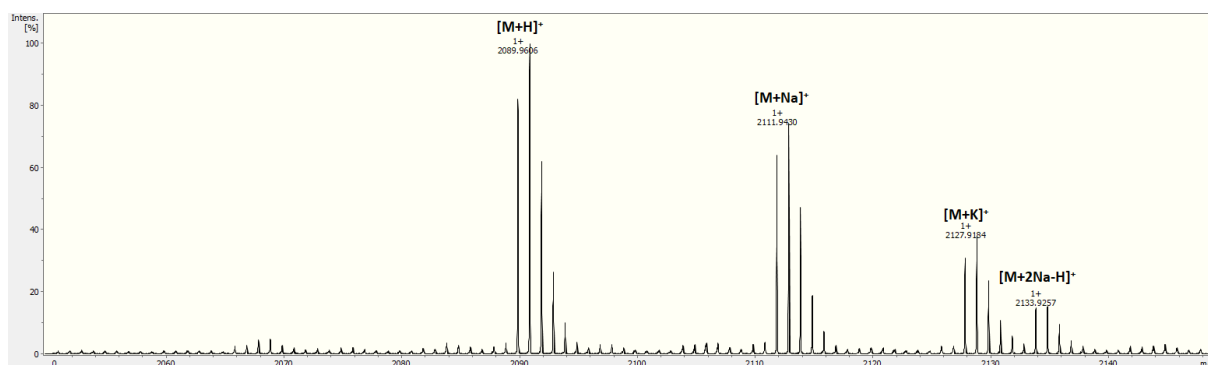

**Figure S21.** MALDI-TOF MS spectrum of unmodified MvB\_CP\_N(Bio) with relevant adduct ions labelled. Overview of measured and calculated masses can be found in Table S1.

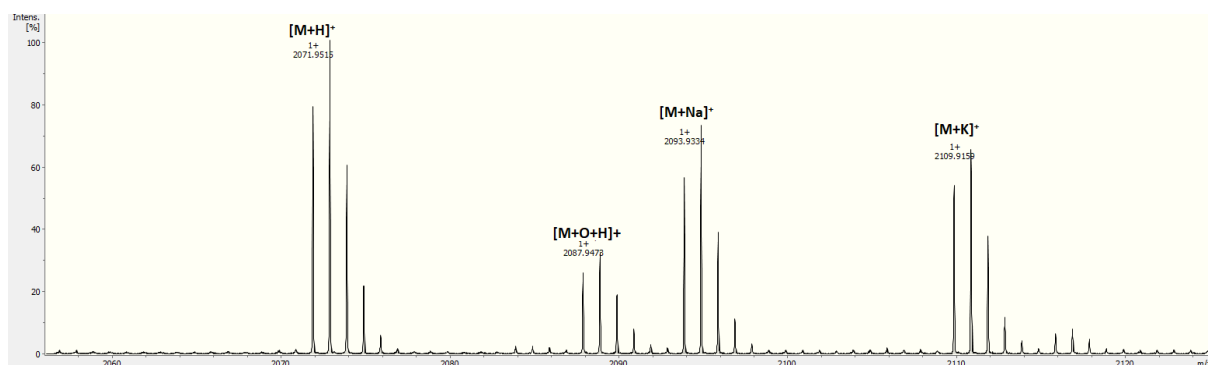

**Figure S22.** MALDI-TOF MS spectrum of monocyclic MvB\_CP\_N(Bio) with relevant adduct ions labelled. Overview of measured and calculated masses can be found in Table S1.

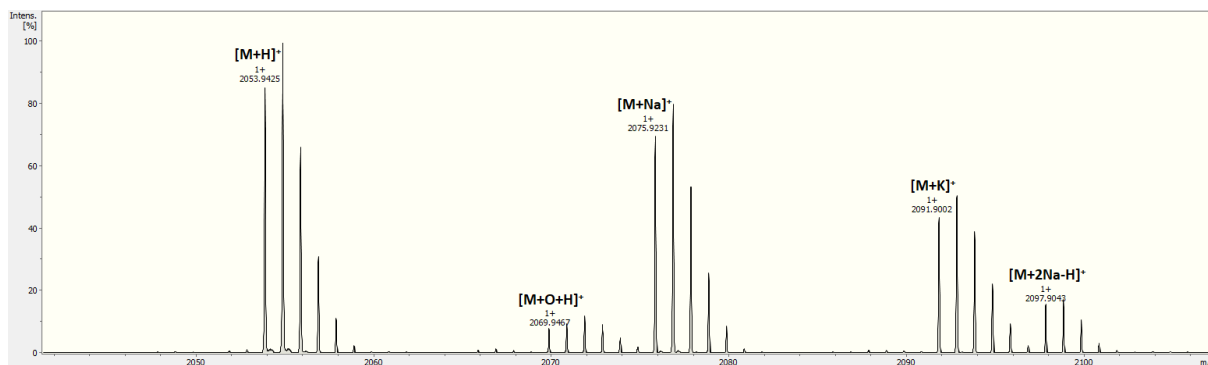

**Figure S23.** MALDI-TOF MS spectrum of bicyclic MvB\_CP\_N(Bio) with relevant adduct ions labelled. Overview of measured and calculated masses can be found in Table S1.

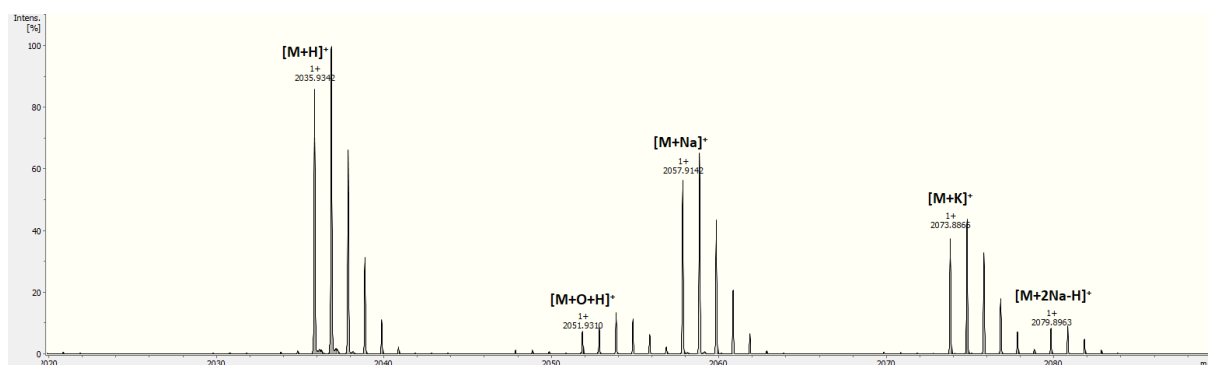

**Figure S24.** MALDI-TOF MS spectrum of tricyclic MvB\_CP\_N(Bio) with relevant adduct ions labelled. Overview of measured and calculated masses can be found in Table S1.

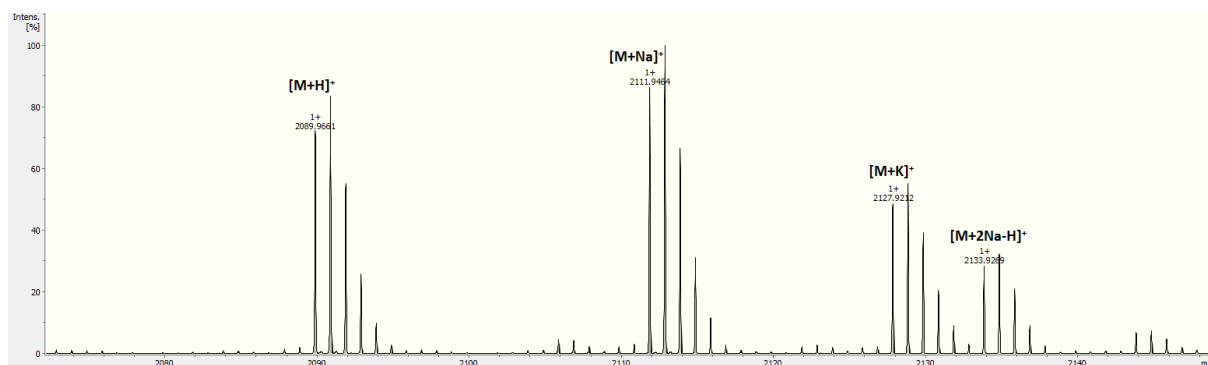

**Figure S25.** MALDI-TOF MS spectrum of unmodified MvB\_CP\_C(Bio) with relevant adduct ions labelled. Overview of measured and calculated masses can be found in Table S1.

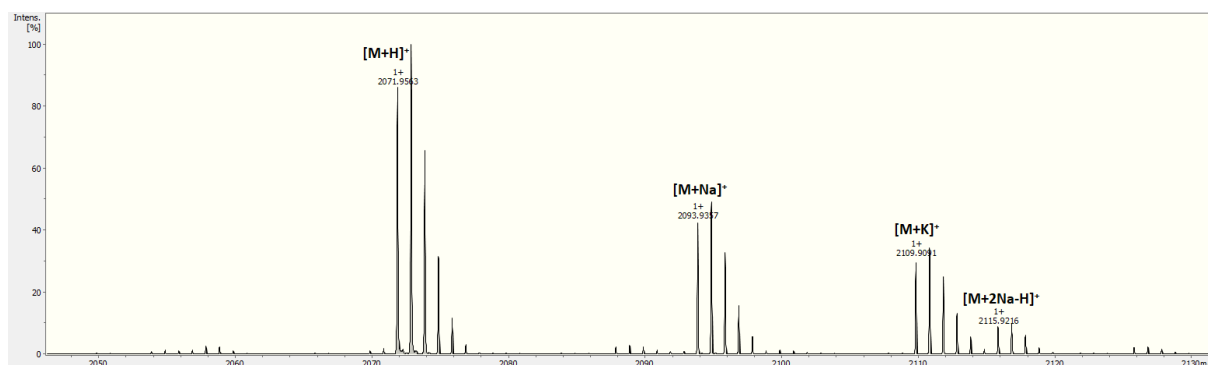

**Figure S26.** MALDI-TOF MS spectrum of monocyclic MvB\_CP\_C(Bio) with relevant adduct ions labelled. Overview of measured and calculated masses can be found in Table S1.

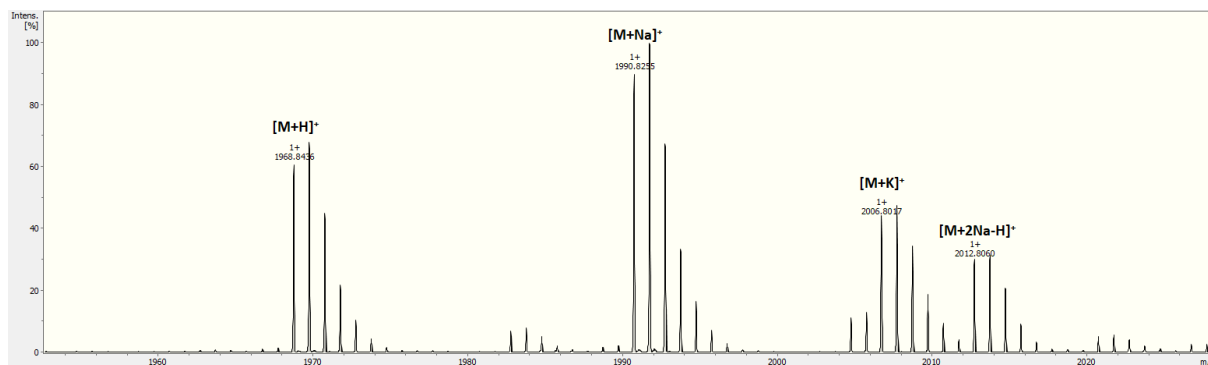

**Figure S27.** MALDI-TOF MS spectrum of unmodified MvJ\_CP\_N(dansyl) with relevant adduct ions labelled. Overview of measured and calculated masses can be found in Table S1.

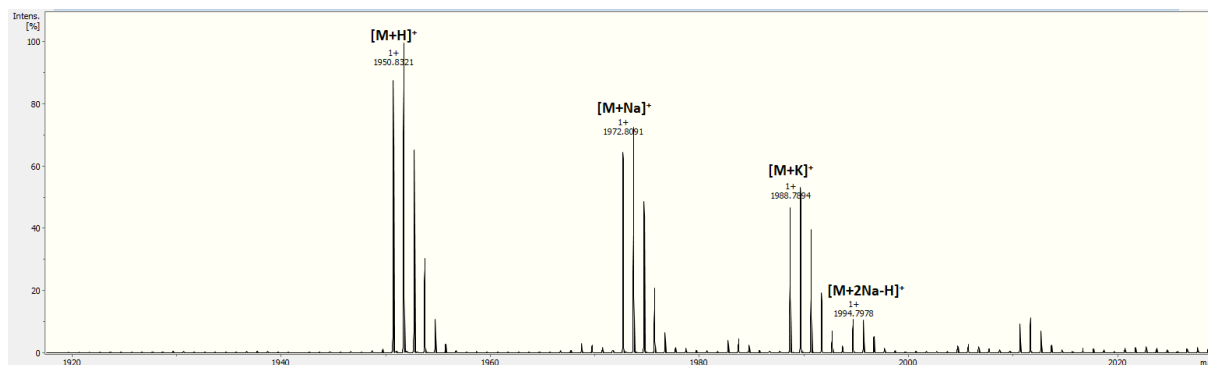

**Figure S28.** MALDI-TOF MS spectrum of monocyclic MvJ\_CP\_N(dansyl) with relevant adduct ions labelled. Overview of measured and calculated masses can be found in Table S1.

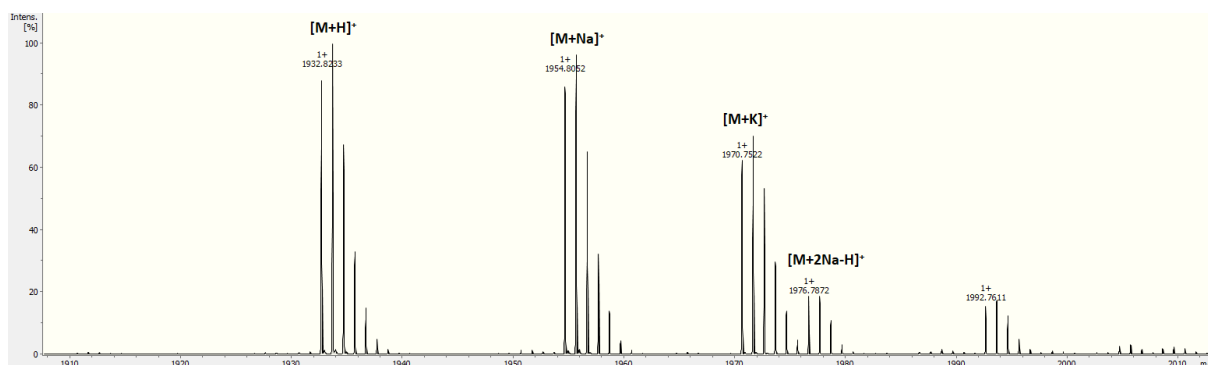

**Figure S29.** MALDI-TOF MS spectrum of bicyclic MvJ\_CP\_N(dansyl) with relevant adduct ions labelled. Overview of measured and calculated masses can be found in Table S1.

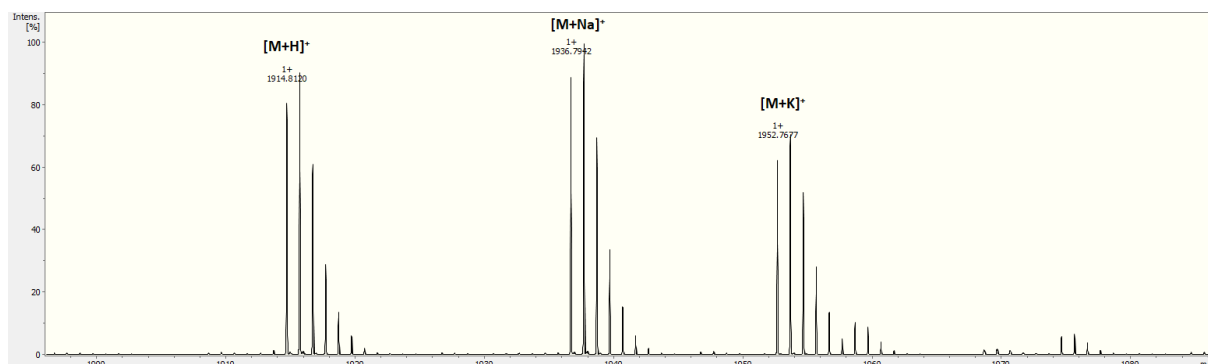

**Figure S30.** MALDI-TOF MS spectrum of tricyclic MvJ\_CP\_N(dansyl) with relevant adduct ions labelled. Overview of measured and calculated masses can be found in Table S1.

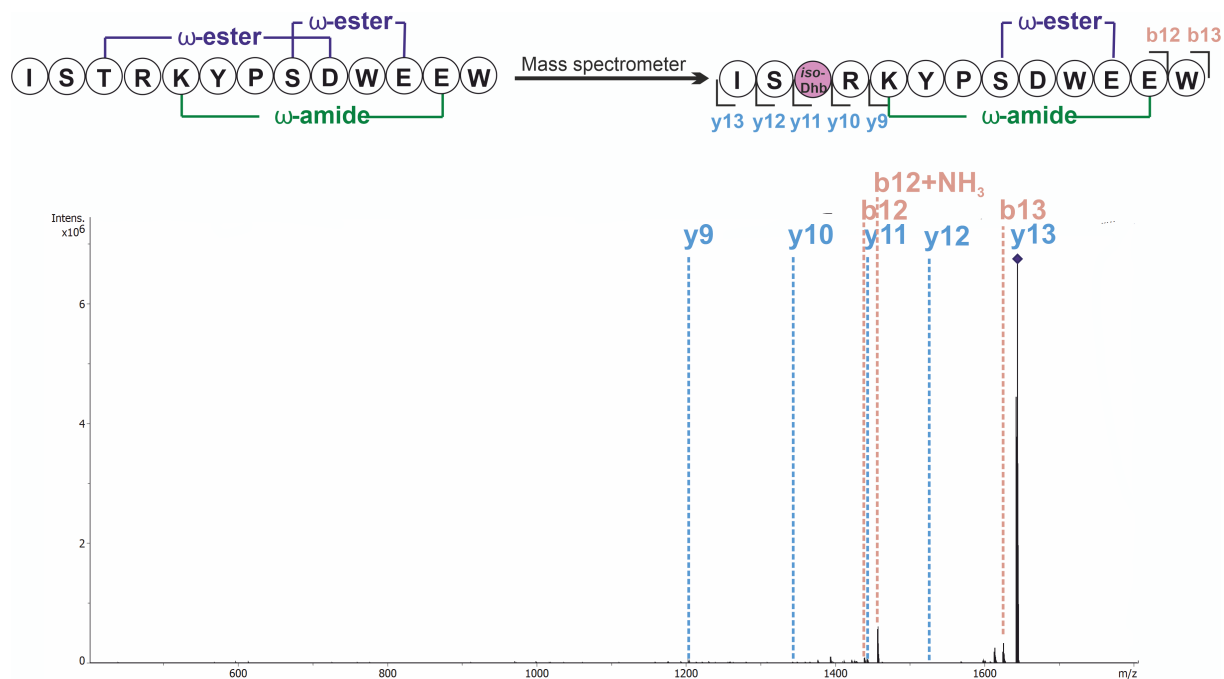

**Figure S31.** MALDI-TOF MS/MS spectrum of tricyclic MvJ\_CP (microviridin J core peptide) (1), which shows a fragmentation pattern diagnostic for the tricyclic architecture of microviridins. As previously reported,<sup>[1]</sup> the N-terminal lactone ring of microviridin opens during MALDI-TOF MS/MS analysis due to a rearrangement reaction, yielding a dehydrated threonine (*iso*-dehydrobutyrine; *iso*-Dhb) and the carboxylic acid moiety of aspartate instead of a lactone bond (Fig. S37). For a comprehensive list of all calculated and observed fragment ions see the supplementary Excel file.

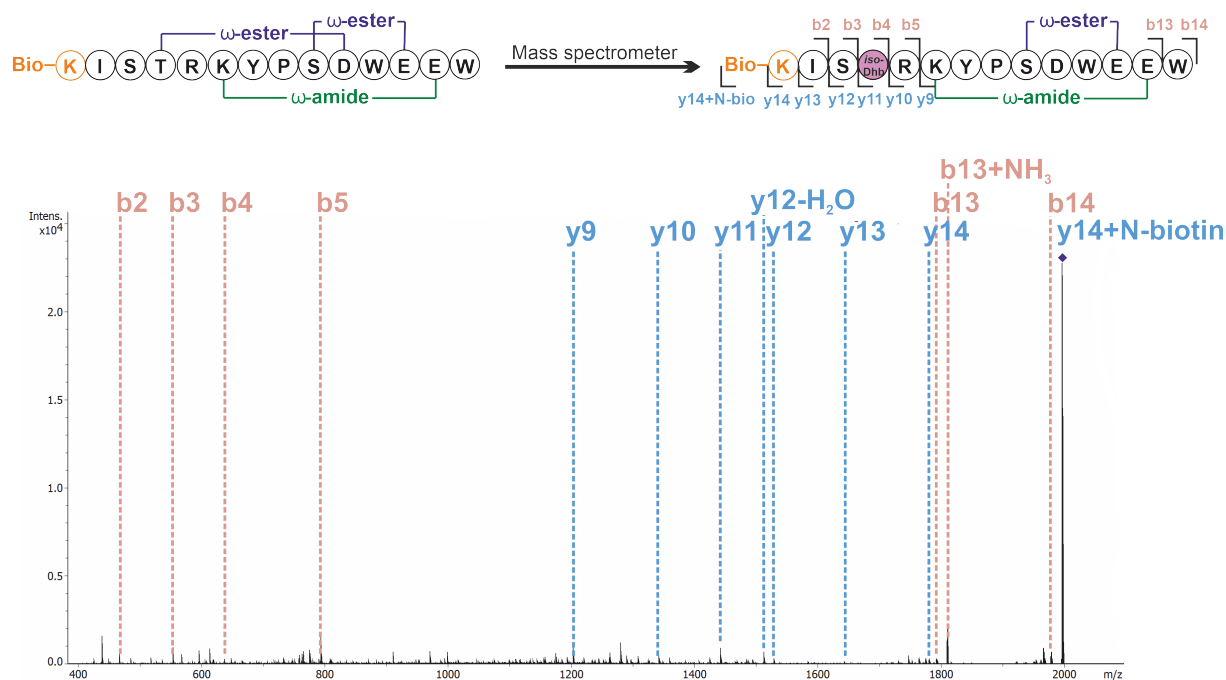

**Figure S32.** MALDI-TOF MS/MS spectrum of tricyclic MvJ\_CP\_N(Bio) (microviridin J core peptide with N-terminal  $N^{\epsilon}$ -biotinyl-L-lysine) (**2**), which shows a fragmentation pattern diagnostic for the tricyclic architecture of microviridins. As previously reported,<sup>[1]</sup> the N-terminal lactone ring of microviridin opens during MALDI-TOF MS/MS analysis due to a rearrangement reaction, yielding a dehydrated threonine (*iso*-dehydrobutyrine; *iso*-Dhb) and the carboxylic acid moiety of aspartate instead of a lactone bond (Fig. S37). For a comprehensive list of all calculated and observed fragment ions see the supplementary Excel file.

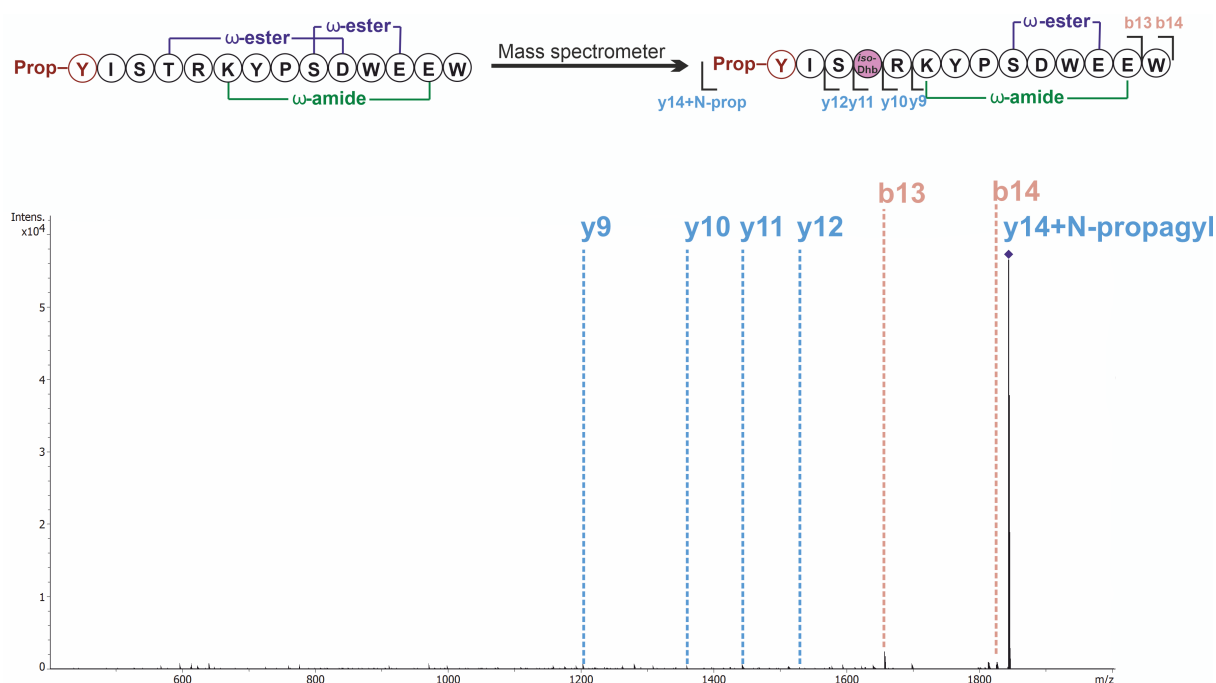

**Figure S33.** MALDI-TOF MS/MS spectrum of tricyclic MvJ\_CP\_N(Prop) (microviridin J core peptide with N-terminal *O*-propargyl-L-tyrosine) (**3**), which shows a fragmentation pattern diagnostic for the tricyclic architecture of microviridins. As previously reported,<sup>[1]</sup> the N-terminal lactone ring of microviridin opens during MALDI-TOF MS/MS analysis due to a rearrangement reaction, yielding a dehydrated threonine (*iso*-dehydrobutyrine; *iso*-Dhb) and the carboxylic acid moiety of aspartate instead of a lactone bond (Fig. S37). For a comprehensive list of all calculated and observed fragment ions see the supplementary Excel file.

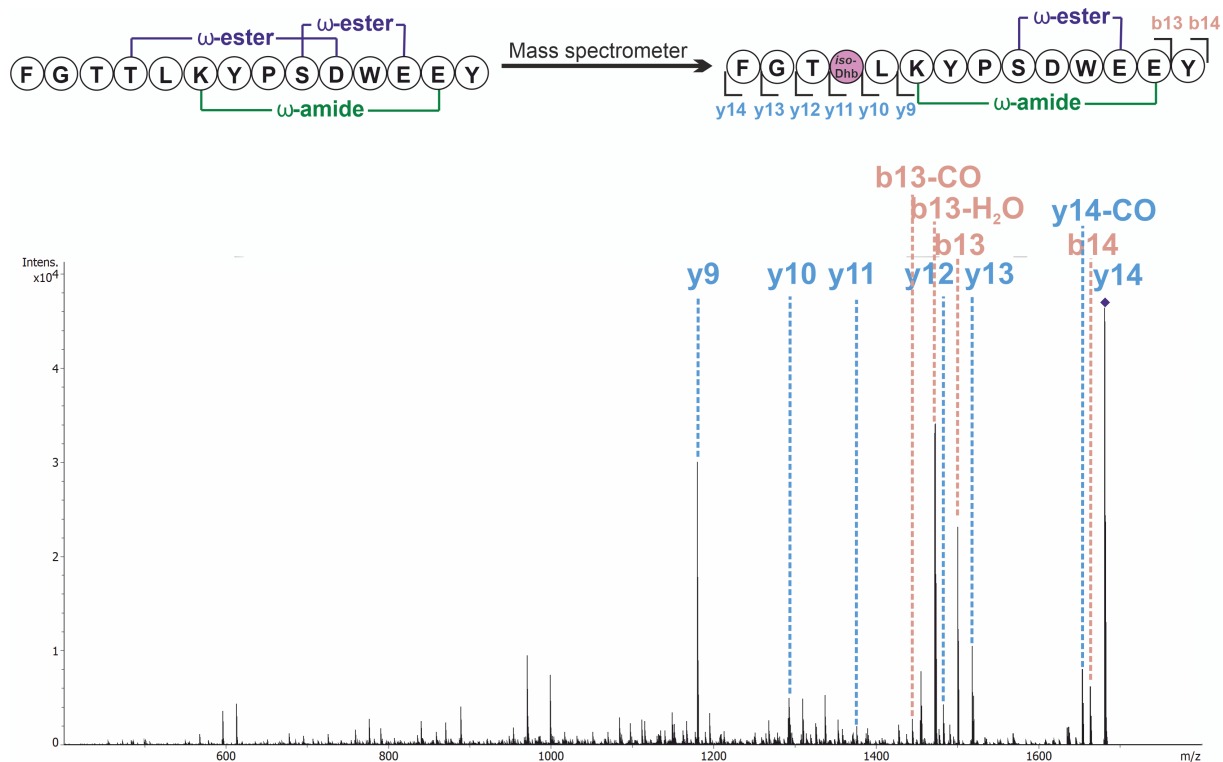

**Figure S34.** MALDI-TOF MS/MS spectrum of tricyclic MvB\_CP (microviridin B core peptide) (**4**), which shows a fragmentation pattern diagnostic for the tricyclic architecture of microviridins. As previously reported,<sup>[1]</sup> the N-terminal lactone ring of microviridin opens during MALDI-TOF MS/MS analysis due to a rearrangement reaction, yielding a dehydrated threonine (*iso*-dehydrobutyrine; *iso*-Dhb) and the carboxylic acid moiety of aspartate instead of a lactone bond (Fig. S37). For a comprehensive list of all calculated and observed fragment ions see the supplementary Excel file.

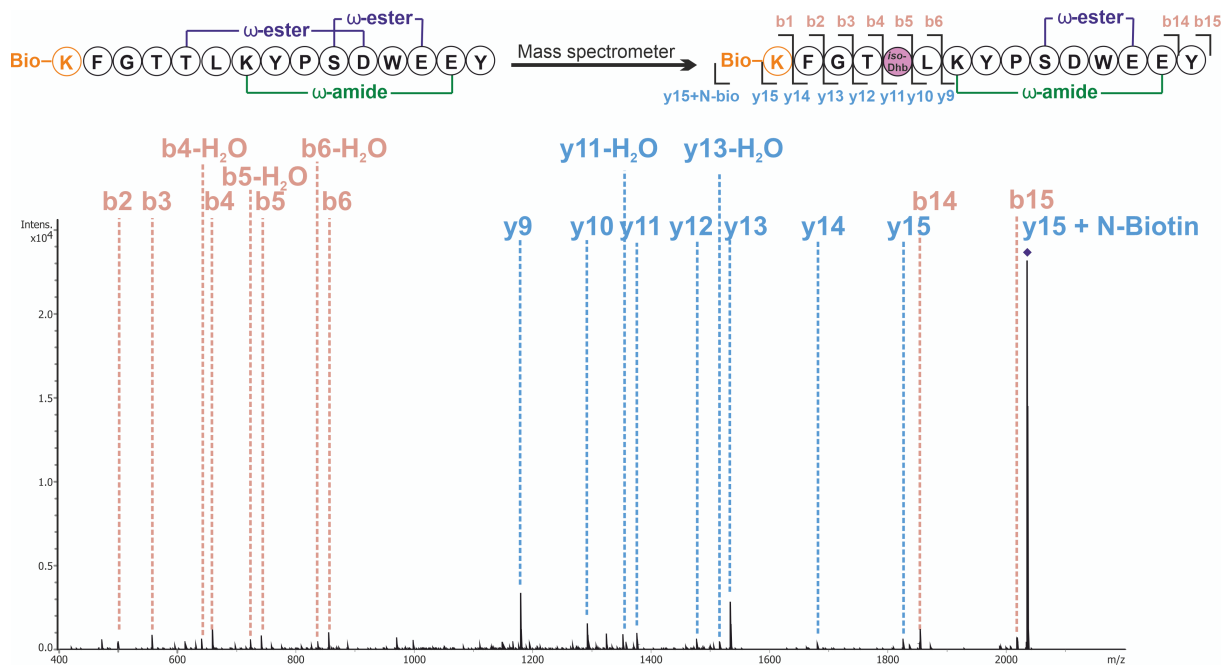

**Figure S35.** MALDI-TOF MS/MS spectrum of tricyclic MvB\_CP\_N(Bio) (microviridin B core peptide with N-terminal *N*<sup>ε</sup>-biotinyl-L-lysine) (**5**), which shows a fragmentation pattern diagnostic for the tricyclic architecture of microviridins. As previously reported,<sup>[1]</sup> the N-terminal lactone ring of microviridin opens during MALDI-TOF MS/MS analysis due to a rearrangement reaction, yielding a dehydrated threonine (*iso*-dehydrobutyrine; *iso*-Dhb) and the carboxylic acid moiety of aspartate instead of a lactone bond (Fig. S37). For a comprehensive list of all calculated and observed fragment ions see the supplementary Excel file.

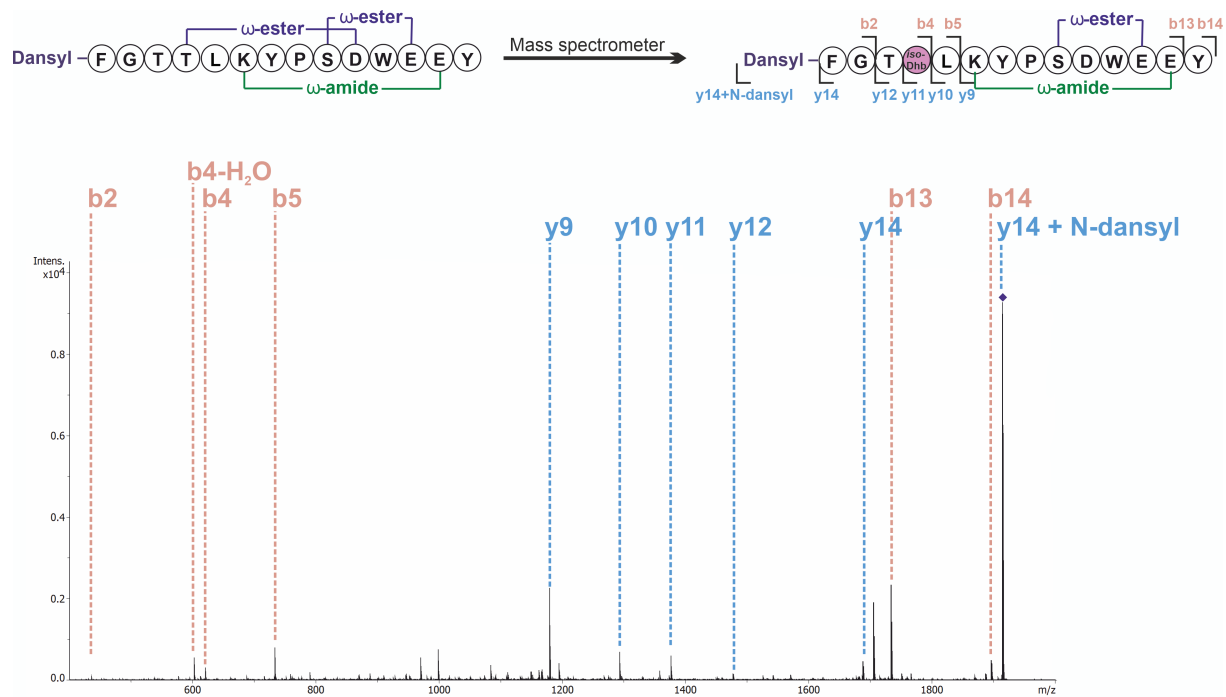

**Figure S36.** MALDI-TOF MS/MS spectrum of tricyclic MvB\_CP\_N(dansyl) (microviridin B core peptide with a N-terminal dansyl group) (**6**), which shows a fragmentation pattern diagnostic for the tricyclic architecture of microviridins. As previously reported,<sup>[1]</sup> the N-terminal lactone ring of microviridin opens during MALDI-TOF MS/MS analysis due to a rearrangement reaction, yielding a dehydrated threonine (*iso*-dehydrobutyrine; *iso*-Dhb) and the carboxylic acid moiety of aspartate instead of a lactone bond (Fig. S37). For a comprehensive list of all calculated and observed fragment ions see the supplementary Excel file.

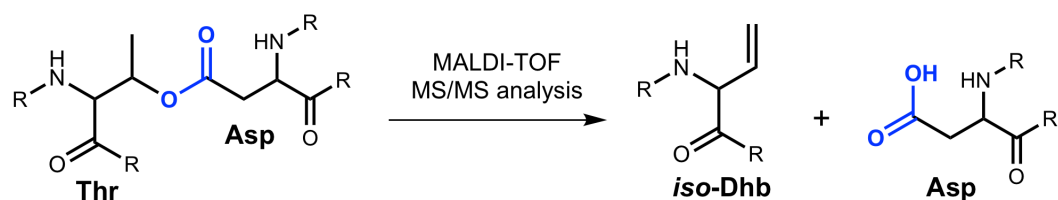

**Figure S37.** Ring-opening reactions during MS/MS analysis. Opening of the N-terminal lactone ring of microviridin due to a rearrangement reaction yielding a dehydrated threonine (*iso*-dehydrobutyrine; *iso*-Dhb) and the carboxylic acid moiety of aspartate. This reaction is frequently observed in MALDI-TOF MS/MS analysis of microviridins and microviridin-like compounds.<sup>[1]</sup>

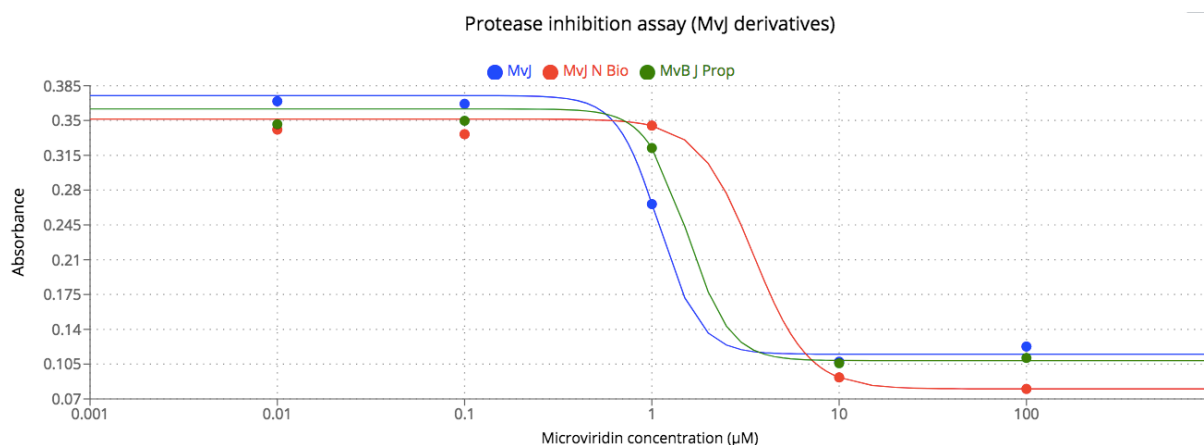

**Figure S38.** Results of the protease inhibition assay of the microviridin J derivatives. The plots were created with the Quest Graph™ IC<sub>50</sub> Calculator.<sup>[2]</sup>



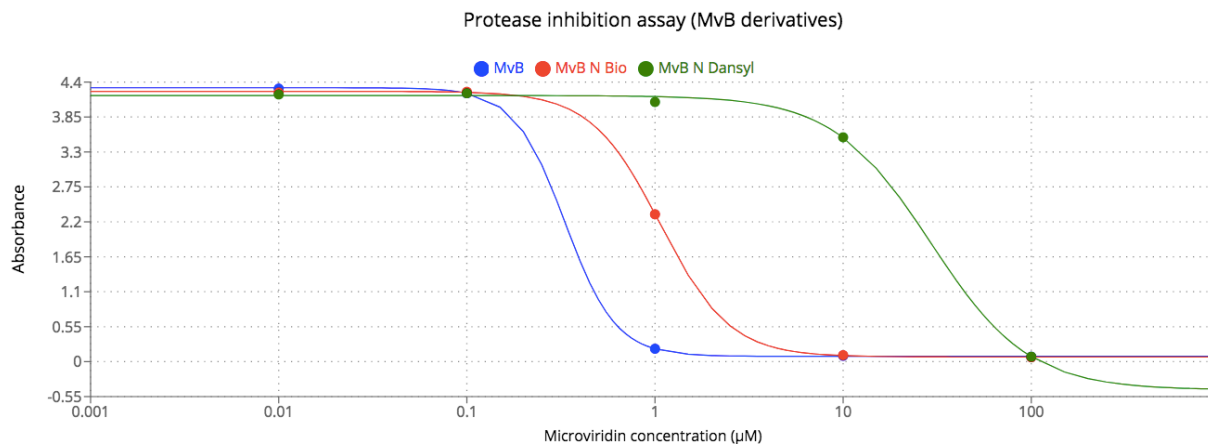

**Figure S39.** Results of the protease inhibition assay of the microviridin B derivatives. The plots were created with the Quest Graph™ IC50 Calculator.<sup>[2]</sup>

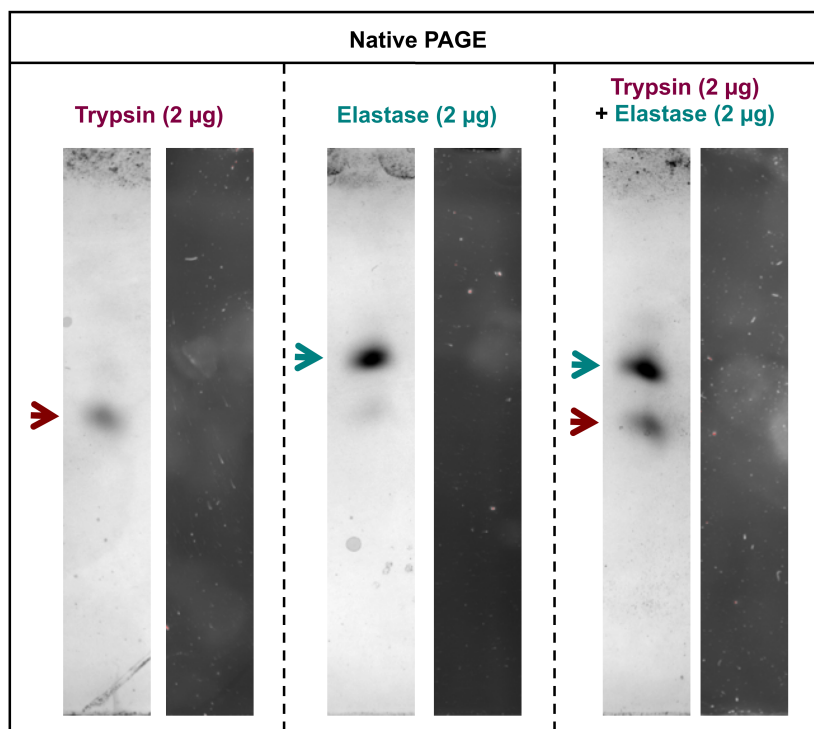

**Figure S40.** Blank control for protease labeling assay.

## References

- [1] a) D. Dehm, J. Krumbholz, M. Baunach, V. Wiebach, K. Hinrichs, A. Guljamow, T. Tabuchi, H. Jenke-Kodama, R. D. Süssmuth, E. Dittmann, *ACS Chem. Biol.* **2019**, *14*, 1271-1279; b) H. Lee, Y. Park, S. Kim, *Biochemistry* **2017**, *56*, 4927-4930; c) H. Roh, Y. Han, H. Lee, S. Kim, *Chembiochem* **2019**, *20*, 1051-1059.
- [2] "Quest Graph™ IC50 Calculator." AAT Bioquest, Inc., 18 May. 2022, <https://http://www.aatbio.com/tools/ic50-calculator>.
